# Supplementary material for: Characterization of Diabetic and Non-Diabetic Foot Ulcers Using Single-Cell RNA-Sequencing
Source: PubMed Central journal article supplement (PMC7570277; doi:10.3390/mi11090815), 2020-08-28
Supplement: micromachines-11-00815-s001.pdf [file micromachines-11-00815-s001.pdf]

**Supplementary Table 1.** Subject demographics.

|                                                  | <b>Diabetic Foot Ulcer</b> | <b>Plantar (Non-Diabetic) Pressure Ulcer</b> |
|--------------------------------------------------|----------------------------|----------------------------------------------|
| <b>Gender</b>                                    | Male                       | Male                                         |
| <b>Age</b>                                       | 55                         | 90                                           |
| <b>Cold Ischemia Time<br/>(in 10% FBS media)</b> | 1.5 hrs                    | 3.0 hrs                                      |

**Supplementary Table 2.** Congruence scores for each cluster against candidate cell subtypes using the automated annotation tool SingleR using the Human Primary Cell Atlas (HPCA) reference dataset.

| Cell Type                     | Cluster   |           |           |           |
|-------------------------------|-----------|-----------|-----------|-----------|
|                               | Cluster1  | Cluster2  | Cluster3  | Cluster4  |
| Neutrophils                   | 0.2637539 | 0.1778974 | 0.6873177 | 0.2255986 |
| Monocytes                     | 0.4072305 | 0.279386  | 0.5663235 | 0.3210987 |
| MEP                           | 0.334222  | 0.3256397 | 0.2019464 | 0.3054729 |
| CD4+ T-cells                  | 0.322949  | 0.275375  | 0.2557965 | 0.2963024 |
| Tregs                         | 0.3132264 | 0.2746157 | 0.2682454 | 0.2767004 |
| CD4+ Tcm                      | 0.3180245 | 0.2785369 | 0.2677064 | 0.281688  |
| CD4+ Tem                      | 0.3269443 | 0.2839054 | 0.2712913 | 0.2824864 |
| CD8+ Tcm                      | 0.3280422 | 0.2807525 | 0.2726947 | 0.2804991 |
| CD8+ Tem                      | 0.3272097 | 0.2706733 | 0.2741275 | 0.2773866 |
| NK cells                      | 0.3269174 | 0.2646455 | 0.3150644 | 0.2792845 |
| naive B-cells                 | 0.307616  | 0.2581024 | 0.2986889 | 0.2977399 |
| Memory B-cells                | 0.3056279 | 0.2667161 | 0.2891223 | 0.2906208 |
| Class-switched memory B-cells | 0.3113318 | 0.2697008 | 0.2928975 | 0.2898009 |
| HSC                           | 0.3496716 | 0.295291  | 0.2370775 | 0.3376862 |
| MPP                           | 0.3475003 | 0.3164852 | 0.2516936 | 0.3415848 |
| CLP                           | 0.3500479 | 0.2848172 | 0.2373085 | 0.2971385 |
| GMP                           | 0.3643887 | 0.3136537 | 0.2630997 | 0.3216182 |
| Macrophages                   | 0.437638  | 0.3506188 | 0.4322862 | 0.3344808 |
| CD8+ T-cells                  | 0.3227887 | 0.2796308 | 0.3356223 | 0.2736523 |
| Erythrocytes                  | 0.3630036 | 0.3500648 | 0.2232735 | 0.323497  |
| Megakaryocytes                | 0.3450738 | 0.3341088 | 0.2204974 | 0.344902  |
| CMP                           | 0.3424134 | 0.3156131 | 0.4341795 | 0.3162707 |
| Macrophages M1                | 0.4419945 | 0.3573396 | 0.373684  | 0.3272991 |
| Macrophages M2                | 0.4166397 | 0.3708212 | 0.329898  | 0.3518724 |
| Endothelial cells             | 0.4843405 | 0.4521842 | 0.13313   | 0.6772455 |
| DC                            | 0.4348255 | 0.3301969 | 0.3810592 | 0.3398959 |
| Eosinophils                   | 0.2557496 | 0.2037673 | 0.4881594 | 0.2429877 |
| Plasma cells                  | 0.3094286 | 0.3187595 | 0.237726  | 0.3069675 |
| Chondrocytes                  | 0.6221791 | 0.4674089 | 0.1142751 | 0.4839637 |
| Fibroblasts                   | 0.6201043 | 0.4843506 | 0.1091398 | 0.5092274 |
| Smooth muscle                 | 0.6004802 | 0.4674223 | 0.1014581 | 0.4974195 |
| Epithelial cells              | 0.489848  | 0.7177673 | 0.1244614 | 0.4917009 |
| Melanocytes                   | 0.4751381 | 0.4652431 | 0.1325311 | 0.4396141 |
| Skeletal muscle               | 0.5128924 | 0.4043033 | 0.1150099 | 0.4977156 |
| Keratinocytes                 | 0.4579401 | 0.7080667 | 0.1196829 | 0.4287909 |
| mv Endothelial cells          | 0.4552655 | 0.4548601 | 0.1355012 | 0.6734385 |
| Myocytes                      | 0.5752    | 0.4591048 | 0.0948635 | 0.4793548 |
| Adipocytes                    | 0.6242797 | 0.4092869 | 0.2783241 | 0.5713446 |
| Neurons                       | 0.3207616 | 0.3244942 | 0.0068876 | 0.2778464 |
| Pericytes                     | 0.58121   | 0.4755354 | 0.1473425 | 0.4687521 |
| Preadipocytes                 | 0.5860866 | 0.4633824 | 0.0986187 | 0.4570288 |
| Astrocytes                    | 0.523914  | 0.4666439 | 0.0570388 | 0.4407191 |
| Mesangial cells               | 0.5077231 | 0.5376044 | 0.0906405 | 0.4744043 |

# Supplemental Figure 1

**A**

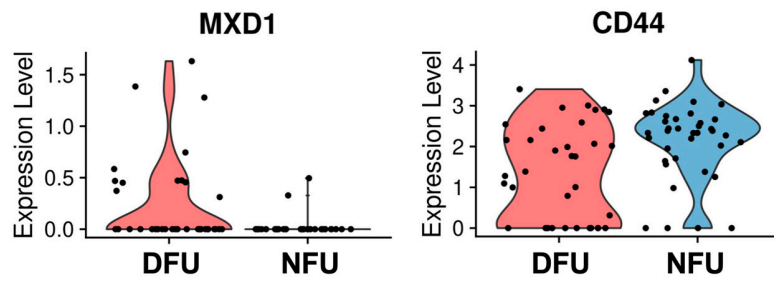

**B**

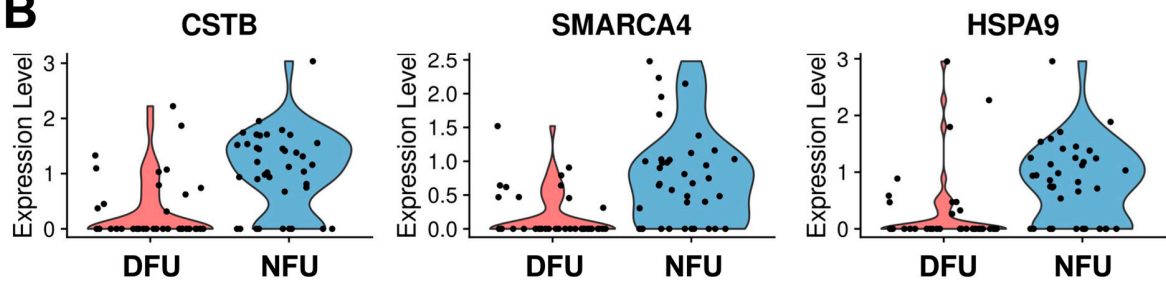

**Supplemental Figure 1.** Diabetic wound fibroblasts exhibit increased expression of inflammatory and decreased expression of anti-apoptotic markers. Violin plots of differentially expressed inflammatory (**A**) and anti-apoptotic (**B**) genes.
